# Supplementary material for: Sequence Diversity in the pe_pgrs Genes of Mycobacterium tuberculosis Is Independent of Human T Cell Recognition
Source: PubMed Central journal article supplement — mBio. 2014 Jan 14;5(1):e00960-13. doi: 10.1128/mBio.00960-13 (PMC3903279; doi:10.1128/mbio.00960-13), 2014-01-14
Supplement: mbo001141709st1.pdf [file mbo001141709st1.pdf]

**Table S1.**  
Sequence characteristics of members of the *pe\_pgrs* family.

| PE_PGRS Sequenced in this Work | Size (aa) | C-term unique domain (aa position) | Intercalated unique sequences (aa position) | Remarks                          |
|--------------------------------|-----------|------------------------------------|---------------------------------------------|----------------------------------|
| <i>PE_PGRS 1</i>               | 497       | -                                  | -                                           | -                                |
| <i>PE_PGRS 2</i>               | 488       | -                                  | -                                           | -                                |
| <i>PE_PGRS 5</i>               | 592       | -                                  | -                                           | -                                |
| <i>PE_PGRS 15</i>              | 607       | -                                  | -                                           | -                                |
| <i>PE_PGRS 23</i>              | 562       | -                                  | -                                           | -                                |
| <i>PE_PGRS 24</i>              | 603       | -                                  | -                                           | -                                |
| <i>PE_PGRS 25</i>              | 577       | -                                  | -                                           | -                                |
| <i>PE_PGRS 26</i>              | 492       | -                                  | -                                           | -                                |
| <i>PE_PGRS 29</i>              | 370       | -                                  | -                                           | -                                |
| <i>PE_PGRS 31</i>              | 618       | -                                  | -                                           | -                                |
| <i>PE_PGRS 33</i>              | 498       | -                                  | -                                           | -                                |
| <i>PE_PGRS 34</i>              | 516       | -                                  | -                                           | -                                |
| <i>PE_PGRS 38</i>              | 533       | -                                  | -                                           | -                                |
| <i>PE_PGRS 41</i>              | 361       | -                                  | -                                           | -                                |
| <i>PE_PGRS 44</i>              | 543       | -                                  | -                                           | -                                |
| <i>PE_PGRS 46</i>              | 778       | -                                  | -                                           | -                                |
| <i>PE_PGRS 47</i>              | 625       | -                                  | -                                           | -                                |
| <i>PE_PGRS 48</i>              | 615       | -                                  | -                                           | -                                |
| <i>PE_PGRS 51</i>              | 588       | -                                  | -                                           | -                                |
| <i>PE_PGRS 58</i>              | 584       | -                                  | -                                           | -                                |
| <i>PE_PGRS 59</i>              | 439       | -                                  | -                                           | -                                |
| <i>Wag22</i>                   | 914       | -                                  | 450 - 550                                   | -                                |
| <i>PE_PGRS 6</i>               | 595       | Yes (517 - 595)                    | -                                           | PE_PGRS_C-terminal Unique Domain |
| <i>PE_PGRS 35</i>              | 558       | yes (250-558)                      | -                                           | PE_PGRS_C-terminal Unique Domain |
| <i>PE_PGRS 39</i>              | 414       | yes (283 - 413)                    | -                                           | PE_PGRS_C-terminal Unique Domain |
| <i>PE_PGRS 62</i>              | 504       | yes (110 - 504)                    | -                                           | PE Unique Domain                 |
| <i>LipY</i>                    | 437       | yes (110 - 437)                    | -                                           | PE Unique Domain                 |

  

| Other PE_PGRS         | Size (aa) | C-term unique domain (aa position) | Intercalated unique sequences (aa position) | Remarks                                      |
|-----------------------|-----------|------------------------------------|---------------------------------------------|----------------------------------------------|
| <i>PE_PGRS 4</i>      | 838       | -                                  | 460 - 510                                   | -                                            |
| <i>PE_PGRS 7</i>      | 1307      | -                                  | -                                           | -                                            |
| <i>PE_PGRS 8</i>      | 176       | -                                  | -                                           | -                                            |
| <i>PE_PGRS 9</i>      | 784       | -                                  | 420 - 500                                   | -                                            |
| <i>PE_PGRS 10</i>     | 802       | -                                  | 370 - 410                                   | -                                            |
| <i>PE_PGRS 12/13*</i> | 137/749   | -                                  | PE_PGRS 13: 360 - 421                       | -                                            |
| <i>PE_PGRS 14</i>     | 882       | -                                  | -                                           | -                                            |
| <i>PE_PGRS 19</i>     | 667       | -                                  | -                                           | -                                            |
| <i>PE_PGRS 20</i>     | 463       | -                                  | -                                           | -                                            |
| <i>PE_PGRS 21</i>     | 767       | -                                  | -                                           | -                                            |
| <i>PE_PGRS 22</i>     | 853       | -                                  | -                                           | -                                            |
| <i>PE_PGRS 27</i>     | 1330      | -                                  | -                                           | -                                            |
| <i>PE_PGRS 28</i>     | 742       | -                                  | -                                           | -                                            |
| <i>PE_PGRS 32</i>     | 639       | -                                  | -                                           | -                                            |
| <i>PE_PGRS 36*</i>    | 494       | -                                  | -                                           | -                                            |
| <i>PE_PGRS 37*</i>    | 257       | -                                  | -                                           | -                                            |
| <i>PE_PGRS 40</i>     | 61        | -                                  | -                                           | -                                            |
| <i>PE_PGRS 42</i>     | 695       | -                                  | 351-359                                     | -                                            |
| <i>PE_PGRS 43</i>     | 1660      | -                                  | -                                           | -                                            |
| <i>PE_PGRS 45</i>     | 461       | -                                  | -                                           | -                                            |
| <i>PE_PGRS 52</i>     | 731       | -                                  | -                                           | -                                            |
| <i>PE_PGRS 53</i>     | 1381      | -                                  | -                                           | -                                            |
| <i>PE_PGRS 54</i>     | 1901      | -                                  | -                                           | -                                            |
| <i>PE_PGRS 57</i>     | 1489      | -                                  | -                                           | -                                            |
| <i>PE_PGRS 60/61*</i> | 104/195   | -                                  | -                                           | -                                            |
| <i>PE_PGRS 3</i>      | 958       | Yes (882 - 958)                    | 490 - 546                                   | PE_PGRS_C-terminal Unique Domain             |
| <i>PE_PGRS 11</i>     | 584       | yes (300 - 584)                    | -                                           | PE_PGRS_C-terminal Unique Domain             |
| <i>PE_PGRS 16</i>     | 924       | yes (650 - 924)                    | -                                           | PE_PGRS_C-terminal Unique Domain             |
| <i>PE_PGRS 17</i>     | 331       | yes (200 - 331)                    | -                                           | PE_PGRS_C-terminal Unique Domain             |
| <i>PE_PGRS 18</i>     | 458       | yes (300 - 458)                    | -                                           | PE_PGRS_C-terminal Unique Domain             |
| <i>PE_PGRS 30</i>     | 1011      | yes (700 - 1011)                   | -                                           | PE_PGRS_C-terminal Unique Domain             |
| <i>PE_PGRS 50/49*</i> | 1538/484  | PE_PGRS 50: Yes (1453 - 1538)      | -                                           | PE_PGRS 50: PE_PGRS_C-terminal Unique Domain |
| <i>PE_PGRS 55/56*</i> | 714/1079  | PE_PGRS 55: Yes (700 - 714)        | -                                           | PE_PGRS 55: PE_PGRS_C-terminal Unique Domain |

The pairs of PE\_PGRS 12 and 13, 36 and 37, 59 and 50, 55 and 56, and 60 and 61 (highlighted with asterisks) are each annotated as two distinct *pe\_pgrs* genes in the H37Rv genome. It is likely that they constitute a single PE\_PGRS protein in an ancestral mycobacterium since they are separated by a frameshift mutation that prevents the synthesis of a functional protein in H37Rv.
