# Supplementary material for: Sequence Diversity in the pe_pgrs Genes of Mycobacterium tuberculosis Is Independent of Human T Cell Recognition
Source: PubMed Central journal article supplement — mBio. 2014 Jan 14;5(1):e00960-13. doi: 10.1128/mBio.00960-13 (PMC3903279; doi:10.1128/mbio.00960-13), 2014-01-14
Supplement: mbo001141709st2.pdf [file mbo001141709st2.pdf]

**Table S2.** Characteristics of bacterial strains used in this study.  
Strains used to perform the principal component analysis are highlighted in grey.

| Lineage 1 |                | Lineage 2 |                | Lineage 3 |                | Lineage 4 |                | Lineage 6 |                |
|-----------|----------------|-----------|----------------|-----------|----------------|-----------|----------------|-----------|----------------|
| Strain ID | Patient origin |
| N0014     | Thailand       | N0003     | Vietnam        | N0004     | India          | N0007     | Mexico         | N0060     | Senegal        |
| N0062     | Cambodia       | N0005     | Indonesia      | N0022     | Ethiopia       | N0011     | Mexico         | N0088     | The Gambia     |
| N0065     | China          | N0008     | Vietnam        | N0033     | Pakistan       | N0046     | Mexico         | N0089     | The Gambia     |
| N0067     | China          | N0010     | Indonesia      | N0037     | Pakistan       | N0101     | Nicaragua      | N0090     | The Gambia     |
| N0069     | China          | N0017     | South Korea    | N0054     | Ethiopia       | N0102     | Nicaragua      | N0091     | The Gambia     |
| N0072     | India          | N0020     | Mongolia       | N0056     | Vietnam        | N0103     | Nicaragua      | N0092     | The Gambia     |
| N0079     | Vietnam        | N0034     | China          | N0197     | Unknown        | N0107     | Guatemala      | N0098     | Unknown        |
| N0127     | China          | N0038     | South Korea    | N1003     | Nepal          | N0109     | El Salvador    | N0099     | Unknown        |
| N0132     | Philippines    | N0041     | Vietnam        | N1007     | Nepal          | N0112     | Peru           | N0115     | The Gambia     |
| N0134     | Philippines    | N0044     | Singapore      | N1014     | Nepal          | N0125     | Ethiopia       |           |                |
| N0141     | Philippines    | N0050     | Vietnam        | N1016     | Nepal          | N0126     | Colombia       |           |                |
| N0153     | Vietnam        | N0051     | China          | N1017     | Nepal          | N0131     | USA            |           |                |
| N0157     | Philippines    | N0059     | Vietnam        | N1021     | Nepal          | N0135     | USA            |           |                |
| N0182     | Unknown        | N0094     | China          | N1022     | Nepal          | N0136     | USA            |           |                |
| N0203     | Unknown        | N0128     | Vietnam        | N1024     | Portugal       | N0138     | USA            |           |                |
| N1004     | Nepal          | N0130     | Cambodia       |           |                | N0142     | USA            |           |                |
| N1006     | Nepal          | N0140     | Macau          |           |                | N0143     | USA            |           |                |
| N1009     | Nepal          | N0150     | China          |           |                | N0144     | China          |           |                |
| N1011     | Nepal          | N0151     | China          |           |                | N0146     | USA            |           |                |
|           |                | N0155     | China          |           |                | N0148     | USA            |           |                |
|           |                | N0158     | China          |           |                | N0149     | USA            |           |                |
|           |                | N1001     | Nepal          |           |                | N0163     | Iran           |           |                |
|           |                | N1012     | Nepal          |           |                | N0167     | Unknown        |           |                |
|           |                | N1013     | Nepal          |           |                | N0185     | Unknown        |           |                |
|           |                |           |                |           |                | N1008     | Nepal          |           |                |
|           |                |           |                |           |                | N1015     | Nepal          |           |                |
|           |                |           |                |           |                | N1019     | Nepal          |           |                |
