# Supplementary material for: Sequence Diversity in the pe_pgrs Genes of Mycobacterium tuberculosis Is Independent of Human T Cell Recognition
Source: PubMed Central journal article supplement — mBio. 2014 Jan 14;5(1):e00960-13. doi: 10.1128/mBio.00960-13 (PMC3903279; doi:10.1128/mbio.00960-13), 2014-01-14
Supplement: mbo001141709st3.pdf [file mbo001141709st3.pdf]

**Table S3.** Genetic diversity parameters of the *pe\_pgrs* genes sequenced in this study (*Wag22* omitted because of its high frequency of disruption or deletion).

|                                              |                                                      | PE_PGRS1    | PE_PGRS2    | PE_PGRS5    | PE_PGRS6    | PE_PGRS15   | PE_PGRS23 | PE_PGRS24   | PE_PGRS25   | PE_PGRS26   |
|----------------------------------------------|------------------------------------------------------|-------------|-------------|-------------|-------------|-------------|-----------|-------------|-------------|-------------|
| Full length                                  | Nucleotide sequence length                           | 1491        | 1644        | 1830        | 1878        | 1808        | 1689      | 1812        | 1719        | 1542        |
|                                              | Number of variable sites                             | 9           | 11          | 16          | 7           | 7           | 3         | 7           | 10          | 8           |
|                                              | Number of sites with gaps                            | 189         | 558         | 88          | 504         | 16          | 109       | 48          | 12          | 531         |
|                                              | Number of haplotypes                                 | 10          | 6           | 14          | 7           | 8           | 4         | 8           | 12          | 9           |
|                                              | Haplotype (gene) diversity                           | 0.447       | 0.272       | 0.454       | 0.474       | 0.56        | 0.097     | 0.634       | 0.797       | 0.66        |
|                                              | Nucleotide diversity                                 | 0.0004      | 0.00051     | 0.00042     | 0.00042     | 0.00034     | 0.00006   | 0.00045     | 0.00098     | 0.00089     |
|                                              | dN/dS                                                | 1.244623695 | 4.125       | 0.872566372 | 0.650513347 | 2.017884914 | inf       | 1.253839935 | 1.639669421 | 0.766483516 |
| Synonymous SNP                               | 3                                                    | 2           | 5           | 5           | 2           | 0           | 2         | 2           | 3           |             |
| Nonsynonymous SNP                            | 6                                                    | 9           | 11          | 8           | 5           | 4           | 6         | 8           | 6           |             |
| PE Domain                                    | PE domain nucleotide sequence length                 | 330         | 330         | 330         | 330         | 330         | 330       | 330         | 330         | 330         |
|                                              | Number of polymorphic sites                          | 0           | 0           | 2           | 3           | 1           | 0         | 2           | 2           | 3           |
|                                              | Number of haplotypes                                 | 1           | 1           | 3           | 4           | 2           | 1         | 3           | 3           | 4           |
|                                              | Nucleotide diversity                                 | 0           | 0           | 0.00014     | 0.00029     | 0.00059     | 0         | 0.00048     | 0.00098     | 0.00066     |
|                                              | dN/dS                                                | 0           | 0           | inf         | 0.764705882 | inf         | 0         | 0.370833333 | inf         | 0.70781893  |
|                                              | Synonymous SNP                                       | 0           | 0           | 0           | 1           | 0           | 0         | 1           | 0           | 1           |
|                                              | Nonsynonymous SNP                                    | 0           | 0           | 2           | 3           | 1           | 0         | 1           | 2           | 1           |
| PGRS Domain<br>(or Unique C-terminal Domain) | PGRS or C-terminal domain nucleotide sequence length | 1162        | 1314        | 1394        | 1548        | 1492        | 1359      | 1479        | 1401        | 1212        |
|                                              | Number of polymorphic sites                          | 9           | 10          | 19          | 4           | 6           | 3         | 5           | 8           | 7           |
|                                              | Number of haplotypes                                 | 10          | 6           | 16          | 5           | 7           | 4         | 6           | 8           | 7           |
|                                              | Nucleotide diversity                                 | 0.00053     | 0.0007      | 0.00049     | 0.00046     | 0.0004      | 0.00006   | 0.00062     | 0.00098     | 0.001       |
|                                              | dN/dS                                                | 0.838323353 | 3.767045455 | 0.32874105  | 1.244897959 | 1.645933014 | inf       | inf         | 1.26446281  | 0.797520661 |
|                                              | Synonymous SNP                                       | 3           | 2           | 5           | 4           | 2           | 0         | 1           | 2           | 2           |
|                                              | Nonsynonymous SNP                                    | 6           | 9           | 9           | 5           | 4           | 4         | 5           | 6           | 5           |

  

|                                              |                                                      | PE_PGRS29   | PE_PGRS31   | PE_PGRS33   | PE_PGRS34   | PE_PGRS35   | PE_PGRS38   | PE_PGRS39   | PE_PGRS41   | PE_PGRS44   |
|----------------------------------------------|------------------------------------------------------|-------------|-------------|-------------|-------------|-------------|-------------|-------------|-------------|-------------|
| Full length                                  | Nucleotide sequence length                           | 1110        | 1795        | 1542        | 1560        | 1667        | 1689        | 1239        | 1149        | 1740        |
|                                              | Number of variable sites                             | 4           | 12          | 8           | 5           | 5           | 11          | 4           | 7           | 12          |
|                                              | Number of sites with gaps                            | 1           | 72          | 385         | 12          | 0           | 420         | 0           | 64          | 198         |
|                                              | Number of haplotypes                                 | 5           | 13          | 8           | 5           | 6           | 11          | 4           | 8           | 12          |
|                                              | Haplotype (gene) diversity                           | 0.334       | 0.365       | 0.234       | 0.083       | 0.243       | 0.764       | 0.375       | 0.488       | 0.788       |
|                                              | Nucleotide diversity                                 | 0.00032     | 0.00022     | 0.00032     | 0.00007     | 0.00017     | 0.00153     | 0.00041     | 0.00057     | 0.00111     |
|                                              | dN/dS                                                | 0.391194969 | 1.227591582 | 0.566255144 | 1.599274705 | 1.969063545 | 0.447587616 | 0.384787472 | 0.401298701 | 0.198455949 |
| Synonymous SNP                               | 2                                                    | 3           | 6           | 4           | 1           | 7           | 2           | 3           | 8           |             |
| Nonsynonymous SNP                            | 2                                                    | 9           | 8           | 1           | 5           | 8           | 2           | 3           | 4           |             |
| PE Domain                                    | PE domain nucleotide sequence length                 | 330         | 330         | 330         | 330         | 330         | 330         | 330         | 330         | 330         |
|                                              | Number of polymorphic sites                          | 1           | 2           | 1           | 1           | 1           | 0           | 0           | 1           | 1           |
|                                              | Number of haplotypes                                 | 2           | 3           | 2           | 2           | 2           | 1           | 1           | 2           | 2           |
|                                              | Nucleotide diversity                                 | 0.00007     | 0.00026     | 0.00008     | 0.00006     | 0.00006     | 0           | 0           | 0.00033     | 0.00019     |
|                                              | dN/dS                                                | inf         | 0.376569038 | 0           | inf         | 0           | 0           | 0           | 0           | 0           |
|                                              | Synonymous SNP                                       | 0           | 1           | 2           | 0           | 1           | 0           | 0           | 1           | 1           |
|                                              | Nonsynonymous SNP                                    | 1           | 1           | 0           | 1           | 0           | 0           | 0           | 0           | 0           |
| PGRS Domain<br>(or Unique C-terminal Domain) | PGRS or C-terminal domain nucleotide sequence length | 780         | 1551        | 1212        | 1230        | 1347        | 1359        | 909         | 819         | 1410        |
|                                              | Number of polymorphic sites                          | 3           | 12          | 6           | 4           | 9           | 11          | 4           | 6           | 14          |
|                                              | Number of haplotypes                                 | 4           | 13          | 7           | 5           | 5           | 11          | 4           | 7           | 12          |
|                                              | Nucleotide diversity                                 | 0.00042     | 0.00021     | 0.00027     | 0.00007     | 0.00059     | 0.002       | 0.00041     | 0.00067     | 0.00136     |
|                                              | dN/dS                                                | 0.202898551 | 0.831417625 | 2.190226876 | 1.226327945 | inf         | 0.334832584 | 0.388379205 | 0.413207547 | 0.305944056 |
|                                              | Synonymous SNP                                       | 2           | 8           | 4           | 1           | 0           | 7           | 2           | 2           | 7           |
|                                              | Nonsynonymous SNP                                    | 1           | 8           | 8           | 3           | 5           | 8           | 2           | 3           | 4           |

  

|                                              |                                                      | PE_PGRS46   | PE_PGRS47   | PE_PGRS48   | PE_PGRS51   | PE_PGRS58   | PE_PGRS59   | PE_PGRS62   | LipY    |
|----------------------------------------------|------------------------------------------------------|-------------|-------------|-------------|-------------|-------------|-------------|-------------|---------|
| Full length                                  | Nucleotide sequence length                           | 2339        | 1611        | 1836        | 1773        | 1755        | 1344        | 1515        | 1314    |
|                                              | Number of variable sites                             | 13          | 10          | 12          | 9           | 10          | 9           | 7           | 5       |
|                                              | Number of sites with gaps                            | 19          | 34          | 18          | 84          | 225         | 54          | 0           | 0       |
|                                              | Number of haplotypes                                 | 12          | 9           | 14          | 10          | 10          | 10          | 8           | 6       |
|                                              | Haplotype (gene) diversity                           | 0.751       | 0.579       | 0.707       | 0.417       | 0.636       | 0.332       | 0.407       | 0.467   |
|                                              | Nucleotide diversity                                 | 0.00055     | 0.00077     | 0.00063     | 0.00029     | 0.00076     | 0.00029     | 0.000375    | 0.00052 |
|                                              | dN/dS                                                | 0.945331695 | 0.268452381 | 0.80883473  | 3.4831553   | 0.487741935 | 0.115905904 | 2.197106691 | inf     |
| Synonymous SNP                               | 4                                                    | 6           | 4           | 1           | 5           | 7           | 1           | 0           |         |
| Nonsynonymous SNP                            | 9                                                    | 4           | 8           | 9           | 6           | 2           | 6           | 5           |         |
| PE Domain                                    | PE domain nucleotide sequence length                 | 330         | 330         | 330         | 330         | 330         | 330         | 330         | 330     |
|                                              | Number of polymorphic sites                          | 1           | 4           | 0           | 0           | 1           | 1           | 0           | 1       |
|                                              | Number of haplotypes                                 | 2           | 5           | 1           | 1           | 2           | 2           | 1           | 2       |
|                                              | Nucleotide diversity                                 | 0.00008     | 0.00197     | 0           | 0           | 0.00037     | 0.00007     | 0           | 0.00059 |
|                                              | dN/dS                                                | inf         | 0.119444444 | 0           | 0           | inf         | inf         | 0           | 0       |
|                                              | Synonymous SNP                                       | 0           | 3           | 0           | 0           | 0           | 0           | 0           | 0       |
|                                              | Nonsynonymous SNP                                    | 1           | 1           | 0           | 1           | 1           | 1           | 0           | 1       |
| PGRS Domain<br>(or Unique C-terminal Domain) | PGRS or C-terminal domain nucleotide sequence length | 2004        | 1281        | 1536        | 1443        | 1425        | 1014        | 1185        | 948     |
|                                              | Number of polymorphic sites                          | 10          | 6           | 12          | 9           | 9           | 8           | 7           | 2       |
|                                              | Number of haplotypes                                 | 13          | 6           | 14          | 10          | 9           | 9           | 8           | 5       |
|                                              | Nucleotide diversity                                 | 0.00076     | 0.00046     | 0.00077     | 0.00035     | 0.00087     | 0.00037     | 0.00048     | 0.00028 |
|                                              | dN/dS                                                | 0.860230548 | 0.413636364 | 0.824626866 | 3.097037794 | 0.336342043 | 0.060708979 | 2.182448037 | inf     |
|                                              | Synonymous SNP                                       | 4           | 3           | 4           | 1           | 5           | 7           | 1           | 0       |
|                                              | Nonsynonymous SNP                                    | 8           | 3           | 8           | 8           | 5           | 1           | 6           | 4       |
