# Supplementary material for: Sequence Diversity in the pe_pgrs Genes of Mycobacterium tuberculosis Is Independent of Human T Cell Recognition
Source: PubMed Central journal article supplement — mBio. 2014 Jan 14;5(1):e00960-13. doi: 10.1128/mBio.00960-13 (PMC3903279; doi:10.1128/mbio.00960-13), 2014-01-14
Supplement: mbo001141709st4.pdf [file mbo001141709st4.pdf]

**Table S4.** Indel diversity parameters of the *pe\_pgrs* genes sequenced in this study.

|                                | PE_PGRS1 | PE_PGRS2 | PE_PGRS5 | PE_PGRS6 | PE_PGRS15 | PE_PGRS23 | PE_PGRS24 | PE_PGRS25 | PE_PGRS26 |
|--------------------------------|----------|----------|----------|----------|-----------|-----------|-----------|-----------|-----------|
| Number of inframe indel events | 1        | 8        | 8        | 9        | 2         | 3         | 4         | 1         | 12        |
| Average indel length, bp       | 189      | 137      | 18.57    | 63.7     | 1.13      | 289.6     | 123.5     | 2.6       | 850.71    |
| Number of indel haplotypes     | 2        | 12       | 10       | 11       | 7         | 6         | 8         | 6         | 15        |
| Indel haplotype Diversity      | 0.021    | 0.695    | 0.693    | 0.85     | 0.203     | 0.657     | 0.546     | 0.257     | 0.651     |
| Indel diversity per site       | 0.00001  | 0.00057  | 0.00059  | 0.00089  | 0.00013   | 0.00049   | 0.00036   | 0.00017   | 0.00083   |

  

|                                | PE_PGRS29 | PE_PGRS31 | PE_PGRS33 | PE_PGRS34 | PE_PGRS35 | PE_PGRS38 | PE_PGRS39 | PE_PGRS41 | PE_PGRS44 |
|--------------------------------|-----------|-----------|-----------|-----------|-----------|-----------|-----------|-----------|-----------|
| Number of inframe indel events | 0         | 2         | 10        | 2         | 2         | 10        | 0         | 3         | 5         |
| Average indel length, bp       | 1         | 17.25     | 61.33     | 6         | 65        | 59.1      | 1         | 142       | 39.6      |
| Number of indel haplotypes     | 2         | 5         | 13        | 3         | 4         | 9         | 2         | 5         | 6         |
| Indel haplotype Diversity      | 0.024     | 0.478     | 0.774     | 0.062     | 0.084     | 0.569     | 0.022     | 0.132     | 0.361     |
| Indel diversity per site       | 0.00002   | 0.00027   | 0.00083   | 0.00004   | 0.00005   | 0.00045   | 0.00002   | 0.00016   | 0.00036   |

  

|                                | PE_PGRS46 | PE_PGRS47 | PE_PGRS48 | PE_PGRS51 | PE_PGRS58 | PE_PGRS59 | PE_PGRS62 | LipY     | Wag22   |
|--------------------------------|-----------|-----------|-----------|-----------|-----------|-----------|-----------|----------|---------|
| Number of inframe indel events | 3         | 4         | 2         | 6         | 4         | 5         | 0         | 0        | 3       |
| Average indel length, bp       | 19.14     | 42        | 13.5      | 102.143   | 68.25     | 18        | -         | 1        | 24      |
| Number of indel haplotypes     | 8         | 6         | 3         | 7         | 4         | 6         | -         | 2        | 7       |
| Indel haplotype Diversity      | 0.265     | 0.311     | 0.046     | 0.238     | 0.085     | 0.502     | -         | 0.042    | 0.791   |
| Indel diversity per site       | 0.00016   | 0.00019   | 0.00004   | 0.00016   | 0.00006   | 0.00042   | 0         | 0.000003 | 0.00061 |
