# Supplementary material for: Sequence Diversity in the pe_pgrs Genes of Mycobacterium tuberculosis Is Independent of Human T Cell Recognition
Source: PubMed Central journal article supplement — mBio. 2014 Jan 14;5(1):e00960-13. doi: 10.1128/mBio.00960-13 (PMC3903279; doi:10.1128/mbio.00960-13), 2014-01-14
Supplement: mbo001141709st5.pdf [file mbo001141709st5.pdf]

**Table S5.** The prevalent HLA genes representing human populations used for epitope prediction.

Source: The dbMHC database. <http://www.ncbi.nlm.nih.gov/projects/gv/mhc/>

|                    | <b>HLA-A</b> | Frequency | <b>HLA-B</b> | Frequency | <b>HLA-DRB1</b> | Frequency |
|--------------------|--------------|-----------|--------------|-----------|-----------------|-----------|
| Australia          | A*34:01      | 0.401     | B*13:01      | 0.238     | DRB1*08:03      | 0.325     |
| Oceania            | A*24:02      | 0.383     | B*40:01      | 0.144     | DRB1*15:02      | 0.327     |
| Europe             | A*01:01      | 0.164     | B*07:02      | 0.139     | DRB1*15:01      | 0.162     |
| North America      | A*24:02      | 0.377     | B*40:02      | 0.159     | DRB1*14:02      | 0.189     |
| South America      | A*31:01      | 0.358)    | B*15:04      | 0.117     | DRB1*16:02      | 0.304     |
| North-East Asia    | A*11:01      | 0.091     | B*51:01      | 0.095     | DRB1*15:01      | 0.099     |
| South-East Asia    | A*24:02      | 0.299     | B*40:01      | 0.165     | DRB1*12:02      | 0.155     |
| South-West Asia    | A*11:01      | 0.123     | B*51:01      | 0.095     | DRB1*03:01      | 0.109     |
| North Africa       | A*02:01      | 0.176     | B*44:03      | 0.099     | DRB1*03:01      | 0.161     |
| Sub-Saharan Africa | A*23:01      | 0.105     | B*53:01      | 0.08      | DRB1*15:03      | 0.118     |
