# Supplementary material for: Sequence Diversity in the pe_pgrs Genes of Mycobacterium tuberculosis Is Independent of Human T Cell Recognition
Source: PubMed Central journal article supplement — mBio. 2014 Jan 14;5(1):e00960-13. doi: 10.1128/mBio.00960-13 (PMC3903279; doi:10.1128/mbio.00960-13), 2014-01-14
Supplement: mbo001141709st6.pdf [file mbo001141709st6.pdf]

**Tables S6.** Primer sequences.

Sequences in grey background were used for amplification and dideoxynucleotide sequencing; sequences in unshaded areas are internal primers used only for sequencing.

| Locus       | Name                | Nucleotide Sequence (5' to 3') |
|-------------|---------------------|--------------------------------|
| PE_PGRS1    | PGRS1F              | CGCTACATTGGCTCCTAGC            |
|             | PGRS1R              | GCCACTCATCGACCATTG             |
|             | PGRS1Fi             | CGGTGCCAACGGTTACC              |
| PE_PGRS33   | PGRS33F             | CTGAATCGCTCGATCTCTGG           |
|             | PGRS33R             | CCCTGACCAATCCCTCAC             |
|             | PGRS33Fi            | CCGCTAGAGGGTGTGCTCG            |
| PE_PGRS2    | PGRS2F              | ATTACCTAACAAATGCTGCTCC         |
|             | PGRS2R              | CCAGCCTTAAGGTCGCGG             |
|             | PGRS2Fi             | CACGGTCAGGCCATCAGG             |
| PE_PGRS5    | PGRS5F              | GTGTCTTGGCTCCAGGAG             |
|             | PGRS5R              | AACTGCGAATCGGACACCG            |
|             | PGRS5Fi             | CGAACATGCTGCCCGCGGTC           |
| PE_PGRS62   | PGRS62F             | TGTGCCATTAGGCTCCATTG           |
|             | PGRS62R             | GCTTGGATTGGCAAGCTAG            |
|             | PGRS62Fi            | TTCGTACGACCTTGAACCG            |
| PE_PGRS51   | PGRS51F             | CCATATTGGCTAGCATCCG            |
|             | PGRS51R             | ACGAATACAGCCAAGCGGG            |
|             | PGRS51Fi            | CCACTCAGGCGCTGTGG              |
| PE_PGRS26   | PGRS26F             | AGCTCAGAAATGTAACATG            |
|             | PGRS26R             | ATTGCCATTACGACTTGGTG           |
|             | PGRS26Fi            | GGCCGGCGGTTGCTGTGG             |
| PE_PGRS31   | PGRS31F             | TTGCCGAGGGTCAATGGTG            |
|             | PGRS31R             | GATGTGCAGATTGCCATAG            |
|             | PGRS31Fi            | ACGCCAATCCGCTGTG               |
| PE_PGRS35   | PGRS35F             | ATCCGAGATCGAAAGCAG             |
|             | PGRS35R             | AAGCCAGGCGGACATTC              |
|             | PGRS35Fi            | CATCAACAGTTCTGTGACAGCC         |
| wag22       | Wag22F              | CTGGGTGGTGGGATATCC             |
|             | Wag22R              | TTGGCTGGGATCGGGCG              |
|             | Wag22Fi             | CCTATCAGCGCGGACGCG             |
|             | Wag22Ri             | AACTGAGAATGCTCTGCTG            |
|             | Wag22Ri3            | CCGGAACCGATCAAGAAGG            |
|             | Wag22Ri2            | CCGCCGGAAGCGGAAGC              |
|             | Wag22Ri             | GGAGCCGTAGAACAATCC             |
| lipY        | lipYF               | GGTAGTGGTGGCAACTG              |
|             | lipYR               | ATGCGAGCCGACACTAC              |
|             | lipYFi              | CCTGCTGAGTTGTCTGCGC            |
| PE_PGRS62   | PE_PGRS62F          | ATTGGCGGCTCTAACGTTG            |
|             | PE_PGRS62R          | TGCGCAAGGATATGAGAGC            |
|             | PE_PGRS62Fi         | GTTGCTGAAACGATCAATG            |
| PE_PGRS15   | PE_PGRS15F          | AGAACTGGAGACCGGACCC            |
|             | PE_PGRS15R          | GGTCAACGGTGGATGATTC            |
|             | PE_PGRS15Fi         | GCCTACCTTTCGGTTCTGG            |
| PE_PGRS23   | PE_PGRS23F          | CGTAAGCAAGGAGACAGC             |
|             | PE_PGRS23R          | TGCGGATCTGAAGTGGACC            |
|             | PE_PGRS23Fi         | CGACGGTGGCTTGTGTAC             |
| PE_PGRS24   | PE_PGRS24F          | CGCTACCTGTGCTAACTCG            |
|             | PE_PGRS24R          | GCCAAAGCGGCTGTACTGAG           |
|             | PE_PGRS24Fi         | GCTCAACATTGTGAACACGC           |
| PE_PGRS25   | PE_PGRS25F          | ACCTGCGCTTATGCTGACG            |
|             | PE_PGRS25R          | TTGCGCCAGCGAATATCG             |
|             | PE_PGRS25Fi         | GATCAACGGCGGACCATG             |
| PE_PGRS29   | PE_PGRS29F          | CGCTGGATGCGTAAGATAC            |
|             | PE_PGRS29R          | TCTCTCGAGCGGGAAGAAG            |
|             | PE_PGRS29Fi         | -                              |
| PE_PGRS34   | PE_PGRS34F          | GACGCTCAACTGCTGAACC            |
|             | PE_PGRS34R          | AGGCGCTTACTATAGCATG            |
|             | PE_PGRS34Fi         | CCTATCAGCATTGAGTGC             |
| PE_PGRS38   | PE_PGRS38F          | CCCTTGCATCGAAGAAGC             |
|             | PE_PGRS38R          | ATAGGATCGAAAGCCTGCG            |
|             | PE_PGRS38Fi         | GTTTAAACGATGCTCCGCTG           |
| PE_PGRS39   | PE_PGRS39F          | TAGGATTCGCGGTGCAACG            |
|             | PE_PGRS39R          | GACTTCGGTGGCGTATCG             |
|             | PE_PGRS39Fi         | CSAACTCCCAAGATCGCA             |
| PE_PGRS41   | PE_PGRS41F          | ACTGCGCGATGGTCAATG             |
|             | PE_PGRS41R          | GTGGAACGGTCAAAGTCAC            |
|             | PE_PGRS41Fi         | GCTCAACGCCATCAATGCAC           |
| PE_PGRS44   | PE_PGRS44F          | GCGCGAAATGGAGAGCC              |
|             | PE_PGRS44R          | TGGACGACCTGGGATGAC             |
|             | PE_PGRS44Fi         | ATGGCGCAATGGAACAGCG            |
| PE_PGRS46   | PE_PGRS46F          | TTTGTGCTGCCAGTGCTC             |
|             | PE_PGRS46R          | TCCTCGTGGGAAACAGTTG            |
|             | PE_PGRS46Fi         | ACTTTGGTGGCGCTACTGG            |
| PE_PGRS47   | PE_PGRS47F          | CCACCGCAATTGCTGCTG             |
|             | PE_PGRS47R          | GTCCGAACGGTACCAGAAC            |
|             | PE_PGRS47Fi         | CCGTGCTGCTCACTATGC             |
| PE_PGRS48   | PE_PGRS48F          | GCACAGTCTTGAAGGTGAGC           |
|             | PE_PGRS48R          | GATTCGACGTGCTCGGTC             |
|             | PE_PGRS48Fi         | AAGGGCGGTAACGAGGAG             |
| PE_PGRS58   | PE_PGRS58F          | CACCGTSCCTATACGAG              |
|             | PE_PGRS58R          | CGAAGCCACAATGTGCGTG            |
|             | PE_PGRS58Fi         | CAATAGCCGGGACGACATC            |
| PE_PGRS59   | PE_PGRS59F          | GTACGGCAACGGCGTAATG            |
|             | PE_PGRS59R          | CATTGTCGCCAGGCTGTTG            |
|             | PE_PGRS59Fi         | CATAACGGGTTTTGTGGCC            |
| PE_PGRS59   | PE_PGRS59F          | CSATACCGAGAGGCTGAC             |
|             | PE_PGRS59R          | GGTGCTGGCTTATGACACG            |
|             | PE_PGRS59Fi         | CGCTACCAAAAAGTCAAGC            |
| PE_PGRS59   | PE_PGRS59F          | CCGATCCGCTGTGACAATAG           |
|             | PE_PGRS59R          | GTACACTCGGTAGCTGCTC            |
|             | PE_PGRS59Fi         | GGGCTGCTGATGGCAATG             |
| PE_PGRS59Ri | GGTTTGGCCGAACCTGGTG |                                |
